# Supplementary material for: Green recycling of spent Li-ion battery cathodes via deep-eutectic solvents
Source: Royal Society of Chemistry journal article supplement (doi:10.1039/d3ee02978f), 2023-12-26
Supplement: d3ee02978f1.pdf [file d3ee02978f1.pdf]

## Supplementary information

### Green Recycling of Spent Li-ion Battery Cathodes via Deep-Eutectic Solvents

Jingxiu Wang<sup>†</sup>, Yanqiu Lyu<sup>†</sup>, Rong Zeng, Shilin Zhang, Kenneth Davey, Jianfeng Mao\*,  
Zaiping Guo\*

*School of Chemical Engineering, The University of Adelaide, Adelaide SA 5005, Australia.*

<sup>†</sup> *These authors contributed equally to this work*

\* Corresponding authors: [jianfeng.mao@adelaide.edu.au](mailto:jianfeng.mao@adelaide.edu.au), [zaiping.guo@adelaide.edu.au](mailto:zaiping.guo@adelaide.edu.au)

### Contents:

#### 1. Supplementary Tables

**Supplementary Table 1.** Summary of toxicity and biodegradability data for selected DESs.

**Supplementary Table 2.** Progress on selective recovery of Li, Ni and Co from spent LIBs using DESs.

**Supplementary Table 3.** Price of some chemicals used in preparation of DESs ([www.alibaba.com](http://www.alibaba.com)).

**Supplementary Table 1.** Summary of toxicity and biodegradability data for selected DESs.

| DES                      | Molar ratio | Toxicity (mg L <sup>-1</sup> , 30 min,<br>by <i>Aliivibrio fischeri</i> ) | Degradability (%) | Reference |
|--------------------------|-------------|---------------------------------------------------------------------------|-------------------|-----------|
| ChCl                     | -           | 469                                                                       |                   | 1         |
| ChCl-acetic acid         | 1:2         | 130                                                                       |                   |           |
|                          | 1:1         | 197                                                                       |                   |           |
|                          | 2:1         | 337                                                                       |                   |           |
| ChCl-lactic acid         | 1:2         | 30                                                                        |                   |           |
|                          | 1:1         | 62                                                                        |                   |           |
|                          | 2:1         | 67                                                                        |                   |           |
| ChCl-glycolic acid       | 1:2         | 30                                                                        |                   |           |
|                          | 1:1         | 33                                                                        |                   |           |
|                          | 2:1         | 62                                                                        |                   |           |
| ChCl-citric acid         | 1:2         | 16                                                                        |                   |           |
|                          | 1:1         | 22                                                                        | 81.6              |           |
|                          | 2:1         | 32                                                                        |                   |           |
| ChCl-urea                | 1:2         | 41693                                                                     | 97.1              | 2         |
|                          | 1:1         | 59825                                                                     |                   |           |
|                          | 2:1         | 69924                                                                     |                   |           |
| ChCl-glycerol            | 1:2         | 104612                                                                    | 95.9              |           |
|                          | 1:1         | 76726                                                                     |                   |           |
|                          | 2:1         | 90156                                                                     |                   |           |
| ChCl-1,2-<br>propanodiol | 1:2         | 44048                                                                     |                   | 3         |
|                          | 1:1         | 73492                                                                     | 82.6              |           |
|                          | 2:1         | 61342                                                                     |                   |           |
| ChCl-EG                  | 1:2         | 41821                                                                     | 81.9              | 2,4       |
|                          | 1:1         | 67806                                                                     |                   |           |
|                          | 2:1         | 90343                                                                     |                   |           |

**Note:** The EC<sub>50</sub> is effective concentration of antimicrobial agents, and a chemical is considered biodegradable if it reaches a biodegradation level > 60% within 28 days.

**Supplementary Table 2.** Progress on selective recovery of Li, Ni and Co from spent LIBs using DESs.

| Cathode material                                                                                    | DESs                                                 | Metal with Selectivity | Recovery efficiency % | Recovered product                                   | Reference |
|-----------------------------------------------------------------------------------------------------|------------------------------------------------------|------------------------|-----------------------|-----------------------------------------------------|-----------|
| LCO                                                                                                 | ChCl-EG 1:2                                          | Co                     | 90                    | CoC <sub>2</sub> O <sub>4</sub>                     | 5         |
| LCO;<br>Li <sub>3.2</sub> Ni <sub>2.4</sub> Co <sub>1.0</sub><br>Mn <sub>1.4</sub> O <sub>8.3</sub> | EG-tartaric acid (TA) 5:1                            | Li                     | 98.34; 98.86          | Li <sub>2</sub> CO <sub>3</sub>                     | 6         |
| LCO                                                                                                 | ChCl-H <sub>3</sub> PO <sub>4</sub> 1:1              | Co                     | 87.7                  | CoHPO <sub>4</sub>                                  | 7         |
| LCO                                                                                                 | ChCl-Glycerol 1:1.5                                  | Co                     | 95.7                  | Co <sub>3</sub> O <sub>4</sub>                      | 8         |
| LFP: NCM111 mass ratio of 1:1                                                                       | ChCl-FA 1:1 combined with mechano-chemical induction | Li                     | 97.6                  | Li <sub>2</sub> CO <sub>3</sub>                     | 9         |
| LCO                                                                                                 | ChCl-EG-benzoic acid 1:1.6:0.4                       | Co                     | 99.99                 | -                                                   | 10        |
| LCO                                                                                                 | Formic acid (FA); ChCl-FA 2:1                        | Li; Co                 | 99.8; 99.0            | Li <sub>2</sub> CO <sub>3</sub> ; CoCO <sub>3</sub> | 11        |
| NCM532                                                                                              | ChCl-OA 1:1                                          | Ni                     | -                     | NiO or NiC <sub>2</sub> O <sub>4</sub>              | 12        |
| NCM811                                                                                              | ChCl-OA 1:1                                          | Ni                     | 99.1                  | NiC <sub>2</sub> O <sub>4</sub> ·2H <sub>2</sub> O  | 13        |
| LFP                                                                                                 | EG-CC 8:1 combined with O <sub>3</sub>               | Li                     | 92.2                  | LiCl                                                | 14        |

Note: “-” denotes “no data available”.

**Supplementary Table 3.** Price of some chemicals used in preparation of DESs ([www.alibaba.com](http://www.alibaba.com)).

| <b>Chemical</b>                          | <b>Price (USDS kg<sup>-1</sup>)</b> |
|------------------------------------------|-------------------------------------|
| ChCl                                     | 7.8                                 |
| H <sub>2</sub> O                         | 0.5                                 |
| Oxalic acid (OA)                         | 3.75                                |
| DES ChCl-OA 1:1                          | 6.06                                |
| DES ChCl-OA 1:2                          | 3.58                                |
| DES ChCl-OA 1:5                          | 4.60                                |
| DES ChCl-OA 1:1 + 25wt% H <sub>2</sub> O | 4.68                                |
| Acetic acid (AA)                         | 0.8                                 |
| DES ChCl-AA 1:1                          | 5.46                                |
| DES ChCl-AA 1:2                          | 4.29                                |
| DES ChCl-AA 1:5                          | 2.79                                |
| Formic acid (FA)                         | 0.65                                |
| DES ChCl-FA 1:1                          | 5.81                                |
| DES ChCl-FA 1:2                          | 4.69                                |
| DES ChCl-FA 1:5                          | 3.09                                |
| Lactic acid (LA)                         | 2.1                                 |
| DES ChCl-LA 1:1                          | 5.35                                |
| DES ChCl-LA 1:2                          | 4.37                                |
| DES ChCl-LA 1:5                          | 3.30                                |
| Urea                                     | 0.25                                |
| DES ChCl-Urea 1:1                        | 5.28                                |
| DES ChCl-Urea 1:2                        | 4.02                                |
| Ethylene glycol (EG)                     | 1.5                                 |
| DES ChCl-EG 1:1                          | 5.65                                |
| DES ChCl-EG 1:2                          | 4.74                                |
| Maleic acid                              | 15                                  |
| Citric acid                              | 2                                   |
| Tartaric acid                            | 10                                  |
| Succinic acid                            | 5.3                                 |
| Phytic acid                              | 22.0                                |
| PEG                                      | 1.0                                 |
| BeCl                                     | 1.0                                 |
| TOPO                                     | 2.0                                 |
| Guanidine hydrochloride                  | 5.0                                 |
| H <sub>3</sub> PO <sub>4</sub>           | 2.5                                 |
| HCl                                      | 54                                  |
| HNO <sub>3</sub>                         | 58                                  |

## References

- 1 S. P. M. Ventura, F. A. e Silva, A. M. M. Gonçalves, J. L. Pereira, F. Gonçalves and J. A. P. Coutinho, *Ecotoxicol. Environ. Saf.*, 2014, **102**, 48–54.
- 2 B. Y. Zhao, P. Xu, F. X. Yang, H. Wu, M. H. Zong and W. Y. Lou, *ACS Sustain. Chem. Eng.*, 2015, **3**, 2746–2755.
- 3 Y. Huang, F. Feng, J. Jiang, Y. Qiao, T. Wu, J. Voglmeir and Z. G. Chen, *Food Chem.*, 2017, **221**, 1400–1405.
- 4 I. P. E. Macário, S. P. M. Ventura, J. L. Pereira, A. M. M. Gonçalves, J. A. P. Coutinho and F. J. M. Gonçalves, *Ecotoxicol. Environ. Saf.*, 2018, **165**, 597–602.
- 5 P. G. Schiavi, P. Altimari, M. Branchi, R. Zaroni, G. Simonetti, M. A. Navarra and F. Pagnanelli, *Chem. Eng. J.*, 2021, **417**, 129249.
- 6 Z. Yang, S. Tang, X. Huo, M. Guo and M. Zhang, *SSRN Electron. J.*, 2023, **233**, 116337.
- 7 P. Yu, X. Zhou, Z. Li, Y. Yan, *Sci. Total Environ.*, 2020, **705**, 135639.
- 8 H. Yu, S. Wang, Y. Li, Q. Qiao, K. Wang and X. Li, *Green Process. Synth.*, 2022, **11**, 868–874.
- 9 M. Wang, K. Liu, Z. Xu, S. Dutta, M. Valix, D. S. Alessi, L. Huang, J. B. Zimmerman and D. C. W. Tsang, *Environ. Sci. Technol.*, 2023, **57**, 3940–3950.
- 10 X. Li, Y. Li, Q. Qiao, K. Wang, H. Yu, 2023, *Preprint at Research Square*, <https://doi.org/10.21203/rs.3.rs-3562840/v1> (Accessed on 1<sup>st</sup> December 2023).
- 11 L. Chen, Y. Chao, X. Li, G. Zhou, Q. Lu, M. Hua, H. Li, X. Ni, P. Wu and W. Zhu, *Green Chem.*, 2021, **23**, 2177–2184.
- 12 D. L. Thompson, I. M. Pateli, C. Lei, A. Jarvis, A. P. Abbott and J. M. Hartley, *Green Chem.*, 2022, **24**, 4877–4886.
- 13 X. Chang, M. Fan, C. F. Gu, W. H. He, Q. Meng, L. J. Wan and Y. G. Guo, *Angew. Chemie - Int. Ed.*, 2022, **61**, 1–8.
- 14 S. Tang, Z. Yang, M. Zhang and M. Guo, *Environ. Res.*, 2023, **239**, 117393.
